1 **TITLE PAGE**

2  
3 **Title:** BioSkills Guide: Development and National Validation of a Tool for Interpreting the Vision and Change Core  
4 Competencies

5  
6 **Type of manuscript:** Article

7  
8 **Number of characters:** 57,278

9  
10 **Running title:** BioSkills Guide

11  
12 **Authors:** Alexa Clemmons<sup>1</sup>, Jerry Timbrook<sup>2</sup>, Jon Herron<sup>1</sup>, Alison Crowe<sup>1</sup>

13  
14 <sup>1</sup>Department of Biology, University of Washington, Seattle, WA 98195

15 <sup>2</sup>Department of Sociology, University of Nebraska-Lincoln, Lincoln, NE 68588

16  
17 **Corresponding Author:**

18 Alexa Clemmons, alexaclemmons@gmail.com

19 Box 351800, Department of Biology, University of Washington, Seattle, WA 98195

20  
21 **Keywords:** undergraduate, competencies, Vision and Change, curriculum, skills, science process skills,  
22 interdisciplinary, modeling, quantitative reasoning, science and society, communication, collaboration

23  
24  
25  
26  
27  
28  
29  
30  
31  
32  
33  
34  
35  
36  
37  
38

## ABSTRACT

To excel in modern STEM careers, biology majors need a range of transferrable skills, yet skill development is often a relatively underdeveloped facet of the undergraduate curriculum. Here, we have elaborated the Vision and Change core competency framework into a resource called the BioSkills Guide, a set of measurable learning outcomes that can be more readily interpreted and implemented by faculty. Over 600 college biology educators representing over 250 institutions, including 73 community colleges, contributed to the development and validation of the guide. Our grassroots approach during the development phase engaged over 200 educators over the course of five iterative rounds of review and revision. We then gathered evidence of the BioSkills Guide's content validity using a national survey of over 400 educators. Across the 77 outcomes in the final draft, rates of respondent support for outcomes were high (73.5% - 99.5%). Our national sample included college biology educators across a range of course levels, subdisciplines of biology, and institution types. We envision the BioSkills Guide supporting a variety of applications in undergraduate biology, including backward design of individual lessons and courses, competency assessment development, curriculum mapping and planning, and resource development for less well-defined competencies.

## INTRODUCTION

Undergraduate biology students pursue a wide variety of career paths. Approximately 46% of undergraduates majoring in life sciences-related fields go on to STEM or STEM-related occupations, including research, engineering, management, and healthcare (Landivar, 2013). The over half of life science majors employed outside of STEM can be found in non-STEM related management, business, and K-12 education, among many other positions. Considering that the majority of college students and the general public indicate career success as the primary motivation for attending college (Pew Research Center, 2016; Strada Education Network, 2018; Twenge & Donnelly, 2016), it follows that biology programs should include training in transferrable skills that will help students thrive in their post-college pursuits, in or out of STEM.

Employers across fields routinely rank skills such as collaboration, communication, and problem-solving at the top of the list of desirable employee traits (NACE, 2018; Strauss, 2017), and also report that new hires are not adequately trained in these areas (Bayer Corporation, 2014; Hart Research Associates, 2018). While ‘skills gap’ rhetoric and the associated vocational framing of higher education has been criticized (Camilli & Hira, 2019; Cappelli, 2015), college courses are nonetheless a natural environment for skills development because of the opportunities to practice and receive formative feedback from experts (Hora, 2018).

Numerous national reports have pushed STEM educators to reexamine how skills are integrated into undergraduate STEM coursework (NASEM, 2016; NRC, 2003, 2012b). In biology, these recommendations are crystalized in the 2011 report “Vision and Change in Undergraduate Biology Education: A Call to Action” (AAAS, 2011). The recommendations of Vision and Change emerged from discussions among over 500 stakeholders in undergraduate biology education. To prepare students for modern careers, the report urges biology educators to frame discussions of curricula around five core concepts (i.e. big ideas) and six core competencies (i.e. skills, listed in Table 1).

The Vision and Change curricular framework has been embraced by the larger biology community (AAAS, 2019), but descriptions of the concepts and competencies were left intentionally brief to encourage educators to have ongoing conversations about implementation. Since then, two groups have unpacked the core concepts into more detailed frameworks (Brownell, Freeman, Wenderoth, & Crowe, 2014; Cary & Branchaw, 2017). For competencies, biology education researchers have enumerated a variety of skill subsets, including: process skills (Coil, Wenderoth, Cunningham, & Dirks, 2010), experimentation (Pelaez et al., 2017), scientific literacy (Gormally, Brickman, & Lutz, 2012), responsible conduct of research (Diaz-Martinez et al., 2019), quantitative reasoning (Durán & Marshall, 2018; Stanhope et al., 2017), bioinformatics (Wilson Sayres et al., 2018), data science (Kjelvik & Schultheis, 2019), data communication (Angra & Gardner, 2016), modeling (Diaz Eaton et al., 2019; Quillin & Thomas, 2015), the interdisciplinary nature of science (Tripp & Shortlidge, 2019), and scientific writing (Timmerman, Strickland, Johnson, & Payne, 2011). Efforts to define general or STEM-wide education goals for college graduates can also inform how we teach competencies in biology, such as the Association of American College & University VALUE rubrics (Rhodes, 2010) and more targeted work on information literacy (Association of College and Research Libraries, 2015), communication (Mercer-Mapstone & Kuchel, 2017), and process skills (Cole, Lantz, Ruder, Reynders, &

83 Stanford, 2018; Understanding Science, 2016). However, no resource has yet been developed that  
84 *holistically* considers competencies across college biology programs or that is intentionally aligned with  
85 the recommendations of Vision and Change.

86

87 So, with the overarching goal of improving biology undergraduates' acquisition of skills for careers and  
88 life, we set out to expand the six Vision and Change core competencies into measurable learning  
89 outcomes that describe what a general biology major should be able to *do* by the time they graduate.  
90 We call this collection of learning outcomes the "BioSkills Guide". The intention of this work is to  
91 establish competency learning outcomes that:

- 92 (1) define what each of the broadly stated competencies means for an undergraduate biology  
93 major, especially for less commonly discussed competencies such as Modeling and  
94 Interdisciplinary Nature of Science,
- 95 (2) draw on instructor expertise to calibrate an appropriate level of competency that can be  
96 achieved over the course of a 4-year biology program,
- 97 (3) serve as a starting point for backward design of individual courses or departmental  
98 programs, and
- 99 (4) ease interpretation and, therefore, adoption of the Vision and Change core competencies in  
100 undergraduate college curricula.

101

102 We describe here the iterative, mixed-methods approach we used to develop and establish content  
103 validity of the BioSkills Guide. Here, evidence of validity was collected via a national survey, intended  
104 to determine whether we had reached sufficient consensus among college biology educators (similar  
105 to the approach taken by Brownell, Freeman, et al., 2014; and Cary & Branchaw, 2017). The final draft  
106 of the BioSkills Guide contains 77 measurable learning outcomes (20 program-level and 57 course-  
107 level) that elaborate the six Vision and Change core competencies. Both the BioSkills Guide and an  
108 "expanded BioSkills Guide", which contains illustrative examples of skill-building activities intended to  
109 support student mastery of the learning outcomes, are available in Supplemental Materials. The  
110 BioSkills Guide is also available at <https://qubeshub.org/qubesresources/publications/1305>.

111

112

## METHODS

113

114 This work can be divided into two phases: a constructive development phase and an evaluative  
115 validation phase (Figure 1). During the development phase we used a range of methods to gather  
116 biology education community feedback on sequential drafts of the BioSkills Guide: web surveys,  
117 unstructured and semi-structured interviews, workshops, and round tables (Table 2). During the  
118 validation phase we used a web survey to measure support for the final draft among the broader  
119 biology education community. This study was approved by the University of Washington, Human  
120 Subjects Division as exempt (STUDY00001746).

121

### Development Phase

122

123 The initial draft of the BioSkills Guide was developed at a large, public research university in the  
124 Northwest as part of routine departmental curriculum review. We supplemented the initial draft by  
125 cross-checking its content with the literature, leading unstructured interviews with competency

126 experts, and gathering feedback on a portion of the draft at a round table at a national biology  
127 education conference (additional details in Supplemental Materials).

128

129 We next began the first of five rounds of review and revision of iterative drafts of the learning  
130 outcomes (Table 2). First, we collected feedback on Version I of the outcomes from our advisory board  
131 in writing and via a virtual meeting. To review Version II of the guide, we collected written feedback on  
132 outcome importance, clarity, and completeness at a workshop of biology faculty, postdocs, and  
133 graduate students. The final three rounds were larger in scale, and each included surveys to gather  
134 feedback on outcome importance, ease of understanding, completeness, and categorization from at  
135 least 21 college biology educators (5-19 per learning outcome per round) (Table 2, Supplemental Table  
136 4). We recruited respondents at regional and national biology education meetings and through  
137 regional biology education networks. We gathered additional input on Version III-V drafts using four  
138 workshops, one round table, and 14 one-on-one interviews (additional details in Supplemental  
139 Materials).

140

141 At the end of each round of review, we compiled and summarized all relevant data (e.g. workshop,  
142 interview, round table, survey) from that round into a single document to inform revisions. This  
143 document was then reviewed by committee (two authors, AWC and AJC, for Versions I-III revisions;  
144 three authors, AWC, AJC and JCH, for Versions IV-V revisions) and used to collectively decide on  
145 revisions. The committee discussed all revisions and their justifications over the course of several  
146 meetings per round, revisiting relevant feedback from previous rounds as necessary.

147

148 During revisions, we reworded outcomes based on feedback to ensure they were easy to understand,  
149 calibrated to the right level of challenge for an undergraduate program, and widely relevant to a  
150 variety of biology subdisciplines, institution types, and course levels (Supplemental Table 1). New  
151 outcomes were considered for addition if they were suggested by more than one participant. We  
152 removed outcomes only after multiple rounds of low support despite revisions to improve ease of  
153 reading or possible concerns about challenge level. Low support was inferred from low survey ratings  
154 (ranging from 50-88% percent support, with an average of 73.5%) combined with qualitative feedback  
155 indicating the outcome was too specialized or at too high of a challenge level for an undergraduate  
156 general biology major or that the outcome could not be readily assessed. In general, we identified  
157 problems in the drafts by looking at outcomes that had low support or low consensus (e.g., a mixture  
158 of low and high ratings). We then used qualitative feedback from survey comments, workshops, round  
159 tables and interviews to inform revisions.

160

### 161 **Validation Phase**

162 Before proceeding with the national survey, we first conducted a “pilot” validation on a smaller pool of  
163 biology educators (n=20). After reviewing the results, we made a final revision to a single outcome, and  
164 then progressed to the national validation survey (additional details in Supplemental Materials).

165

166 For national validation, we invited participation through direct emails and numerous listservs: Society  
167 for Advancement of Biology Education Research (SABER), Partnership for Undergraduate Life Sciences  
168 Education (PULSE) regional networks, HHMI Summer Institutes, authors of CourseSource articles  
169 tagged with “Science Process Skills”, Community College BiInsites, Northwest Biology Instructors

170 Organization, the Science Education Partnership and Assessment Laboratory network, Human Anatomy  
171 and Physiology Society, SABER Physiology Special Interest Group, several other regional biology  
172 education-related networks, and 38 participants suggested by previous survey participants. We  
173 additionally encouraged advisory board members, other collaborators, and survey respondents to  
174 share the survey invitation widely. Because of this snowball approach and the expected overlap of  
175 many of these lists, it is not possible to estimate the total number of people who were invited to  
176 participate. A total of 397 people completed enough of the survey to be retained for analysis (i.e. they  
177 completed the majority of the outcomes for at least one competency), and 350 completed all assigned  
178 questions. We combined pilot and national validation survey data (n=417 total, 211-237 per outcome)  
179 for the survey data analysis described below.

180

### 181 **Survey Design**

182 We employed five surveys over the course of this project (three in the development phase and two in  
183 the validation phase, see Table 2). Surveys were designed and administered following best practices in  
184 survey design and the principles of social exchange theory (Dillman, Smyth, & Christian, 2014). In order  
185 to participate in any of the surveys, respondents must have served as instructor-of-record of a college-  
186 level biology course. For development phase surveys, respondents rated each learning outcome on  
187 bipolar 5-point Likert scales for: (1) how important or unimportant it is for a graduating general biology  
188 major to achieve ('Very Important', 'Important', 'Neither Important nor Unimportant', 'Unimportant',  
189 and 'Very Unimportant'), and (2) how easy or difficult it is for them to understand ('Very Easy', 'Easy',  
190 'Neither Easy nor Difficult', 'Difficult', 'Very Difficult'). We also asked respondents to comment on their  
191 responses, suggest missing outcomes, and evaluate (yes/no) whether each learning outcome was  
192 accurately categorized within its program-level outcome (when evaluating course-level outcomes) or  
193 competency (when evaluating program-level outcomes). For validation phase surveys, we shortened  
194 the questionnaire by removing the items on ease of understanding and categorization, and reducing  
195 the frequency of questions that asked respondents to comment on their responses. To minimize time  
196 commitments and thus maximize survey responses, we asked respondents to review outcomes  
197 associated with only two (during development phase) or three (during validation phase) randomly  
198 assigned competencies, with the option to review up to all six competencies. We collected respondent  
199 demographic information for all surveys. See Supplemental Tables 2 and 6 for a summary of  
200 demographic information collected. The entire questionnaires for Version V review and national  
201 validation can be found in Supplemental Materials.

202

### 203 **Survey Data Analysis**

204 We calculated and visualized descriptive statistics of survey responses and respondent demographics  
205 in R version 3.5.1 (R Core Team, 2018) using the tidyverse, ggmap, maps, ggthemes, ggpubr, and  
206 wesanderson packages (Arnold, 2019; Kahle & Wickham, 2013; Kassambara, 2018; Ram & Wickham,  
207 2018; Wickham, 2016). For importance and ease of understanding responses, we calculated the mean,  
208 minimum, and maximum ratings (where 5 = 'Very Important' or 'Very Easy' and 1 = 'Very Unimportant'  
209 or 'Very Difficult'). We calculated the percent of respondents who 'Supported' the outcome or found  
210 the outcome easy to understand as the percent of respondents who selected one of the two positive  
211 responses ('Very Important'/'Important' or 'Very Easy'/'Easy', respectively) out of all respondents who  
212 reviewed that outcome. We also calculated the percent of respondents who indicated that the  
213 outcome was accurately categorized within its competency or program-level learning outcome (not

214 shown). We read and summarized the open-ended comments to inform revisions (during development  
215 phase) or to summarize suggestions of missing outcomes (during validation phase). We summarized  
216 responses to demographic questions by calculating the frequency and percent of respondents who  
217 selected different responses for each question. For all participants, we determined the Carnegie  
218 classification of their institution type, minority-serving institution status, and geographic location by  
219 matching their institution name with the 2015 Carnegie dataset (Indiana University Center for  
220 Postsecondary Research, 2016). We then mapped participant locations using their institution's city and  
221 state GPS coordinates, obtained via the Google API (Kahle & Wickham, 2013).

222

### 223 **Statistical Models of Learning Outcome Ratings**

224 We used cross-classified random effects binary logistic regression models to predict the logit of the  
225 probability that a particular respondent will support a particular learning outcome (Raudenbush &  
226 Bryk, 2002). The binary dependent variable 'Support' was coded as described above. We investigated  
227 six categorical independent variables: (1) the competency associated with the learning outcome (see  
228 Table 1) and five respondent demographics. The demographic variables were: (2) institution type  
229 (Associate's, Bachelor's, Master's, or Doctoral Granting) and whether or not the respondent (3) has  
230 experience in discipline-based education research (DBER), (4) is currently engaged in biology research,  
231 (5) has experience in ecology/evolutionary biology research, or (6) has familiarity with Vision and  
232 Change. These respondent characteristics were coded using answers to the survey's demographic  
233 questions (e.g., DBER experience and ecology/evolution experience variables were inferred from jointly  
234 considering responses to field of current research and graduate training questions). After cleaning  
235 (described further in Supplemental Materials), our analytic dataset contained responses from 346 out  
236 of 417 initial respondents, comprising 15,321 importance ratings across 77 learning outcomes.

237

238 For each model, we calculated the proportion of variance in the dependent variable that was due to  
239 random effects. The significance of categorical independent variables with two levels (e.g., experience  
240 with DBER) was assessed using the z-statistic associated with that variable's regression coefficient. We  
241 tested the joint significance of categorical independent variables with three or more levels (e.g.,  
242 institution type) using the Wald Chi-squared statistic. We used predicted probabilities for  
243 interpretation of interactions, with non-overlapping 95% confidence intervals interpreted as  
244 statistically significant differences. We additionally calculated the Akaike information criterion (AIC)  
245 and performed the likelihood ratio (LR) test for all models. Additional details on data cleaning and  
246 statistical modeling approach can be found in Supplemental Materials.

247

### 248 **Aligning Examples with Learning Outcomes**

249 During initial drafting, several faculty working groups included a list of examples of in-class activities  
250 and assignments associated with each learning outcome. After national validation, we updated this list  
251 by revising, adding, or re-aligning examples in keeping with outcome revisions. Example additions drew  
252 from conversations with biology educators throughout the development phase. Two authors (AWC and  
253 AJC), who have experience teaching undergraduate biology courses and expertise in molecular and cell  
254 biology, carried out the drafting and revising portion of this work. To confirm alignment of the  
255 examples with corresponding course-level learning outcomes, three additional college biology  
256 instructors (including author JCH) independently reviewed the examples and assessed alignment  
257 (yes/no). We selected these additional example reviewers based on their complementary expertise in

258 ecology, evolutionary biology, and physiology. We removed or revised examples until unanimous  
259 agreement on alignment was reached.

260

261

## RESULTS

262

### 263 **Development of the BioSkills Guide**

264 Soliciting and incorporating feedback from participants with diverse professional expertise in  
265 undergraduate biology education was essential to ensure the BioSkills Guide was useful on a broad  
266 scale. The initial draft of the guide was crafted by faculty and expanded to include input from 51  
267 unique participants from at least 8 institutions. We then carried out five increasingly larger rounds of  
268 review and revision, engaging approximately 218 unique participants from at least 87 institutions  
269 (Table 2). Throughout the development phase, we monitored demographics of participant pools and  
270 took steps to gather feedback from traditionally under-sampled groups (Figure 3C, Supplemental  
271 Tables 2-3).

272

273 To triangulate faculty perceptions of competency outcomes, we collected and applied quantitative and  
274 qualitative feedback on drafts of the BioSkills Guide (Figure 1). In general, we observed that interview,  
275 workshop, and round table data corroborated many of the trends observed from the surveys, with the  
276 same outcomes being least supported (e.g., rated 'Unimportant') or arousing confusion (e.g., rated  
277 'Difficult' to understand). This provided evidence that the survey was effective at gauging faculty  
278 perceptions of competencies. The survey therefore enabled us to quantitatively assess areas of  
279 strength and weakness within drafts quickly and across a broader population. Using both quantitative  
280 and qualitative feedback, every outcome was revised for substance and/or style at least once over the  
281 course of the development phase, with most outcomes being revised several times (Supplemental  
282 Table 1).

283

284 There are four key structural features of the BioSkills Guide that were introduced by faculty early in the  
285 development phase. First, the initial draft was written as *learning outcomes* (i.e. descriptions of what  
286 students will be able to know and do) rather than statements (i.e. descriptions of the skill itself). We  
287 kept this structure to better support backward design (Wiggins & McTighe, 1998). Second, the guide  
288 has a two-tiered structure: each core competency contains 2-6 *program-level* learning outcomes, and  
289 each program-level learning outcome contains 2-6 *course-level* learning outcomes (this organization is  
290 represented in Supplemental Figure 1). Faculty who participated in the initial drafting spontaneously  
291 generated this nested organization, likely reflecting their intended use(s) of the guide for a range of  
292 curricular tasks at the program and course levels. Third, the initial draft was written at the level of *a*  
293 *graduating general biology major* (four-year program). We decided to keep this focus to align with the  
294 goals of Vision and Change which presented the core concepts and competencies as an overarching  
295 framework for the entire undergraduate biology curricula (AAAS, 2011). A similar approach was taken  
296 during development of the BioCore Guide for the core concepts, based on their finding that the vast  
297 majority of colleges offer a general biology degree (Brownell, Freeman, et al., 2014). Finally, we  
298 decided, via conversations with our advisory board, to include only *measurable* learning outcomes so  
299 as to directly support assessment use and development. This led us to reframe outcomes related to  
300 student attitudes and affect (e.g., an outcome on appreciating the use of models was revised to  
301 "describe why biologists use simplified representations...").



302

303 The term “competency” describes a “blend of content knowledge and related skills” (NRC, 2012b) and  
304 is thus appropriate for describing complex tasks like modeling biological systems or understanding the  
305 interrelatedness of science and society. However, throughout the development of this resource  
306 through workshops, round tables, and informal conversations we found that the term “skill” was more  
307 immediately recognizable (to non-education experts) and less frequently unintentionally swapped with  
308 the term “concept” (especially when talking about “concepts and competencies”). We thus decided to  
309 name the resource the “BioSkills Guide”.

310

### 311 **National Validation of the BioSkills Guide**

312 We gathered evidence of content validity of the final draft of the BioSkills Guide using a national  
313 survey. We decided to move to validation based on the results of Version V review. Specifically, the  
314 lowest rated outcome from the Version V survey had 72.7% support (Figure 2, Supplemental Table 4).  
315 The previous minimums were 16.7% and 50% for Versions III and IV surveys, respectively. Furthermore,  
316 all outcomes were rated ‘Easy’ or ‘Very Easy’ to understand by the majority of respondents  
317 (Supplemental Figure 2, Supplemental Table 5), and no new substantial suggestions for changes were  
318 raised in survey comments or workshop feedback on Version V.

319

320 The validation survey included 417 college biology educators, from at least 225 institutions, who  
321 evaluated the learning outcomes for their importance for a graduating general biology major (Table 2).  
322 Respondents had representation from a range of geographic regions, biology subdisciplines taught,  
323 course levels taught, research focuses, and institution types (Figure 3, Supplemental Table 6), including  
324 respondents representing a range of community colleges and minority-serving institutions (Figure 3C,  
325 Supplemental Table 3).

326

327 Each respondent was asked to review a subset of outcomes, resulting in each outcome being reviewed  
328 by 211-237 college biology educators. The lowest mean importance rating for any outcome was 4  
329 (equivalent to a rating of ‘Important’), and the average mean importance rating across all outcomes  
330 was 4.5 (Supplemental Tables 4, 7). We additionally inferred “Support” for each outcome by calculating  
331 the percent of respondents who reviewed it who rated it as ‘Important’ or ‘Very Important’. Support  
332 ranged from 74.3-99.6%, with a mean of 91.9% (Figure 2, Supplemental Table 4). Nearly two-thirds (or  
333 51) of the 77 outcomes had greater than 90% support (Table 3). Four outcomes had less than 80%  
334 support, with the lowest rated outcome being supported by 74% of respondents who reviewed it  
335 (Table 4). In addition to having them rate the outcomes, we asked respondents to describe any  
336 essential learning outcomes that were missing from the guide (summarized in Supplemental Table 8).

337

### 338 **Interpreting Predictive Models of Learning Outcome Ratings**

339 We were interested in whether respondents with certain demographics differed in their support of  
340 learning outcomes from different competencies, so we examined the interaction of learning outcome  
341 competency and each of five respondent demographic variables. Specifically, we hypothesized that  
342 differences in respondent training (i.e. experience in DBER, experience in ecology/evolution, familiarity  
343 with Vision and Change) or professional culture (i.e. institution type, current engagement in  
344 disciplinary biology research) would affect their perceptions of the usefulness or feasibility of different  
345 types of skills (i.e. outcomes in different competencies). We estimated multi-level generalized linear

346 models to ask if the variation in outcome support could be explained, in part, by differences among  
347 learning outcomes in different competencies, differences among respondents with different  
348 demographics, and/or interactions of particular types of respondents with particular competencies.

349

350 By examining a model containing just random effects for learning outcome and respondent, we found  
351 that 16% of the variance in learning outcome support was due to the learning outcomes themselves  
352 (e.g., wording, content; Model 0, Supplemental Table 9). By adding competency to the model (Model  
353 1), this variance dropped to 11% of total variance, a reduction of 36%. Thus, the competency in which  
354 an outcome is nested explains a considerable amount of the variance in support among outcomes.  
355 However, comparing predicted probabilities of support based on competency, support was quite high  
356 across the board (ranging from 94.2% to 99.1% support) even when significant differences existed  
357 (Figure 4A). For example, support for Modeling outcomes (94.4%) was significantly lower than support  
358 for Process of Science outcomes (98.6%) and Quantitative Reasoning outcomes (99.1%), but both  
359 differences were less than 5 percentage points. We concluded that although competency explains a  
360 significant percent of the observed variation, the variation itself is small, so this finding may not be of  
361 practical importance.

362

363 When interpreting models including interactions of competency with each of the five respondent  
364 demographic variables (Models 12-16), we found that respondents' support of outcomes within each  
365 competency differed significantly based on their institution type ( $p < .01$ ; Model 12), experience in DBER  
366 ( $p < .001$ ; Model 13), and current engagement in biology research ( $p < .01$ ; Model 14) (Supplemental  
367 Tables 10-14). By examining the predicted probabilities, however, we again found that despite these  
368 significant interactions, the magnitudes of differences in support for each combination of competency  
369 and respondent demographic were small (Figure 4B). For example, respondents who have experience  
370 with DBER exhibit similarly high support for Modeling (97.3%), Quantitative Reasoning (98.3%), Process  
371 of Science (98.7%), and Communication and Collaboration (98.0%) outcomes. In contrast, respondents  
372 who do not have experience with DBER are statistically significantly less likely to support Modeling  
373 outcomes (92.8%) than Quantitative Reasoning (98.8%), Process of Science (99.2%), or Communication  
374 and Collaboration (98.6%) outcomes ( $p < .05$ ). However, the average predicted outcome support rates  
375 were uniformly above 90% for all respondent groups and competencies, and the greatest differences  
376 observed was 6.4%, thus we do not believe the observed differences are meaningful in practice.

377

### 378 **Summary of the Core Competencies**

379 Below we provide descriptions of the core competencies that summarize our understandings of college  
380 biology educator priorities, as represented by the learning outcomes in the final draft of the BioSkills  
381 Guide (Supplemental Materials).

382

#### 383 *Process of Science*

384 The Process of Science outcomes are presented in a particular order; however, in practice, they are  
385 applied in a non-linear fashion. For example, scientific thinking and information literacy include  
386 foundational scientific skills such as critical thinking and understanding the nature of science, and thus  
387 are integral to all parts of the process of science. Question formulation, study design, and data  
388 interpretation and evaluation are iteratively applied when carrying out a scientific study, and also must  
389 be mastered to achieve competence in evaluating scientific information. The final program-level

390 outcome, “Doing Research”, emerged from conversations with biology educators who emphasized that  
391 the experience of applying and integrating the other Process of Science outcomes while engaging in  
392 authentic research leads to outcomes that are likely greater than the sum of their parts. Course-based  
393 or independent research experiences in the lab or field are generally thought to be particularly well-  
394 suited for teaching process skills; however, many of these skills can also be learned by engaging with  
395 scientific literature and existing datasets. Competence in Process of Science outcomes will help  
396 students become not only proficient scientists, but also critical thinkers and scientifically literate  
397 citizens.

398

#### 399 *Quantitative Reasoning*

400 This comprehensive interpretation of Quantitative Reasoning includes math, logic, data management  
401 and presentation, and an introduction to computation. Beyond being essential for many data analysis  
402 tasks, this competency is integral to work in all biological subdisciplines and an important component  
403 of several other core competencies. Indeed, the universality of math and logic provide a “common  
404 language” that can facilitate interdisciplinary conversations. Furthermore, the outcomes emphasize the  
405 application of quantitative reasoning *in the context of* understanding and studying biology, mirroring  
406 national recommendations to rethink how math is integrated into undergraduate biology coursework.  
407 In summary, the outcomes presented here can be included in nearly any biology course to support the  
408 development of strong quantitative skills.

409

#### 410 *Modeling*

411 Models are representations of reality that allow scientists to simplify complex and dynamic biological  
412 structures, mechanisms, and systems. Biologists routinely use models qualitatively to develop their  
413 ideas and communicate them with others. Models can also be built and manipulated to refine  
414 hypotheses, predict future outcomes, and investigate relationships among parts of a system. It is  
415 important to note that there are many different types of models, each with their own applications,  
416 strengths, and limitations which must be evaluated by the user. The Modeling outcomes can be  
417 practiced using an array of different model types: mathematical (e.g., equations and charts),  
418 computational (e.g., simulations and animations), conceptual (e.g., diagrams, concept maps), and  
419 physical (e.g., 3D models).

420

#### 421 *Interdisciplinary Nature of Science*

422 Scientific phenomena are not constrained by traditional disciplinary silos. To have a full understanding  
423 of biological systems, students need practice integrating scientific concepts across disciplines, including  
424 multiple fields of biology and disciplines of STEM. Furthermore, today’s most pressing societal  
425 problems are ill-defined and multi-faceted and therefore require interdisciplinary solutions. Efforts to  
426 solve these complex problems benefit from considering perspectives of those working at multiple  
427 biological scales (i.e. molecules to ecosystems), in multiple STEM fields (e.g., math, engineering), in  
428 non-STEM fields (e.g., humanities, social sciences), as well as input from those outside of academia  
429 (e.g., city planners, medical practitioners, community leaders). Productive interdisciplinary biologists  
430 therefore recognize the value in collaborating with experts across disciplines and have the skills  
431 needed to communicate with diverse groups.

432

#### 433 *Communication & Collaboration*

434 Communication and collaboration are essential components of the scientific process. These outcomes  
435 include skills for interacting with biologists, other non-biology experts, and the general public for a  
436 variety of purposes. In the context of undergraduate biology, metacognition involves the ability to  
437 accurately sense and regulate one's behavior both as an individual and as part of a team.  
438 Regardless of their specific career trajectories, all biology students require training in this competency  
439 to thoughtfully and effectively work and communicate with others.

440

#### 441 *Science & Society*

442 Science does not exist in a vacuum. Scientific knowledge is constructed by the people engaged in  
443 science. It builds on past findings and changes in light of new interpretations, new data, and changing  
444 societal influences. Furthermore, advances in science affect lives and environments worldwide. For  
445 these reasons, students should learn to reflexively question not only how scientific findings were  
446 made, but by whom and for what purpose. A more integrated view of science as a socially situated way  
447 of understanding the world will help students be better scientists, advocates for science, and  
448 scientifically literate citizens.

449

#### 450 **Examples of Activities that Support Competency Development**

451 The faculty who wrote the initial draft of the BioSkills Guide included classroom examples in addition  
452 to learning outcomes. A number of early development phase participants expressed that they  
453 appreciated having these examples for use in brainstorming ways competencies might be adapted for  
454 different courses. Based on this positive feedback, we decided to retain and supplement the examples  
455 so that they could be used by others (Supplemental Materials). These examples are *not* exhaustive and  
456 have not undergone the same rigorous process of review as the learning outcomes, but we have  
457 confirmed alignment of the examples with five college biology educators with complementary  
458 interdisciplinary teaching expertise. We envision the examples aiding with interpretation of the learning  
459 outcomes in a variety of class settings (i.e. course levels, subdisciplines of biology, class sizes).

460

461

## 461 **DISCUSSION**

462

### 463 **The BioSkills Guide Is a Nationally Validated Resource for the Core Competencies**

464 Employing feedback from over 600 college biology educators, we have developed and gathered  
465 evidence of validity for a set of 77 essential learning outcomes for the six Vision and Change core  
466 competencies. During national validation, all learning outcomes had support from  $\geq 74\%$  of survey  
467 respondents, with an average of 92% support. This high support suggests that we successfully recruited  
468 and applied input from a range of educators during the development phase. As the broadest skill-  
469 focused learning outcome framework for undergraduate biology education to date, the BioSkills Guide  
470 provides insight on the array of competencies that biology educators believe all biology majors should  
471 acquire during college. We believe it will be helpful in supporting a variety of curricular tasks including  
472 course design, assessment development, and curriculum mapping (Figure 5).

473

### 474 **Examining Variation in Educator Survey Responses**

475 We used statistical modeling to investigate whether respondents' professional backgrounds could  
476 explain their likelihood of supporting outcomes in different competencies. While we detected several  
477 statistically significant interactions of competency with particular respondent demographics, we feel

478 that no differences were large enough to be meaningful on a practical level. In other words, differences  
479 in the perceived importance of particular outcomes by less than 10% of individuals among various  
480 educator populations are unlikely to sway departmental curricular decisions.

481

482 The results of our statistical analyses suggest that (a) there was not sufficient variation in our dataset  
483 to detect substantial differences, (b) educators from different backgrounds (at least those investigated  
484 in this study) think similarly about competencies, or (c) a combination of these two. In support of (a),  
485 51 out of 77 outcomes had greater than 90% support, likely due to our intentional study design of  
486 iteratively revising outcomes to reach consensus. Additionally, it is reasonable that college biology  
487 educators are more culturally alike than different given similarities in training (Grunspan, Kline, &  
488 Brownell, 2018). Thus, we believe the most likely explanation for the small observed differences is a  
489 combination of study design and educator similarities.

490

491 We could not help but note that where demographic by competency interactions existed, trends, albeit  
492 small, consistently pointed toward differences in support for the competency Modeling (Figure 4B).  
493 Further work is needed to determine if this trend is supported, but we offer a hypothesis based on  
494 observations made over the course of this project: Although we strove to write learning outcomes that  
495 are clear and concrete, it is possible that respondents interpreted the difficulty level or focus of  
496 modeling-related learning outcomes differently depending on their personal interpretation of the term  
497 “model”. Varying definitions of models were a common theme in survey comments and interviews.  
498 Recently a group of mathematicians and biologists joined forces to address this issue (Diaz Eaton et al.,  
499 2019). They argue that differences in conceptions of modeling among scientists within and across fields  
500 have stood in the way of progress in integrating modeling into undergraduate courses. In an effort to  
501 improve biology modeling education, they propose a framework, including a definition of model (“a  
502 simplified, abstract or concrete representation of relationships and/or processes in the real world,  
503 constructed for some purpose”) that we believe is consistent with the learning outcomes presented in  
504 the BioSkills Guide. Although numerous modeling practices have been developed and evaluated in the  
505 context of undergraduate biology courses (for example, see Bergan-Roller, Galt, Chizinski, Helikar, &  
506 Dauer, 2018; Bierema, Schwarz, & Stoltzfus, 2017; Dauer, Momsen, Speth, Makohon-Moore, & Long,  
507 2013; Hester et al., 2018; Luckie, Harrison, & Ebert-May, 2011; Zagallo, Meddleton, & Bolger, 2016),  
508 ongoing efforts should continue to expand awareness of the value, relevance, and possible  
509 implementations of modeling in college biology.

510

### 511 **Defining the Scope of Core Competencies**

512 During the development phase, input from participants led us to expand or revise the focus of certain  
513 core competencies relative to their original descriptions in the Vision and Change report (AAAS, 2011).  
514 We believe that these evolutions in understanding are in keeping with the spirit of Vision and Change,  
515 which encouraged practitioners to engage in ongoing conversations about elaboration and  
516 implementation.

517

### 518 *Defining the Role of Research in Process of Science*

519 Vision and Change and other leaders in STEM education have emphasized the importance of  
520 incorporating research experiences into the undergraduate curriculum (AAAS, 2011; Auchincloss et al.,  
521 2014; NASEM, 2017). We therefore drafted a program-level learning outcome related to “doing

522 authentic research” for Process of Science. However, it was initially unclear how this outcome should  
523 be worded and what course-level learning outcomes, if any, should be embedded within it. This  
524 outcome generally had strong support (>80% rating ‘Important’ or ‘Very Important’) throughout the  
525 development phase, but a survey question asking for suggestions of appropriate course-level outcomes  
526 yielded only outcomes found elsewhere in the guide (e.g., collaboration, data analysis, information  
527 literacy) or affect-related outcomes (e.g., persistence, belonging) which we had previously decided  
528 were beyond the scope of this resource. Additional insight into this question was gained through  
529 qualitative approaches (interviews and a round table). Roundtable and interview participants  
530 reiterated that the skills developed during authentic research experiences, whether in a course-based  
531 or independent setting, were distinct from and “greater than the sum of the parts” of those gained  
532 during other activities aimed at practicing individual, related skill sets. Furthermore, numerous  
533 participants indicated the outcome was important for supporting continued efforts to systematically  
534 include research in undergraduate curricula (also see, Cooper, Soneral, & Brownell, 2017). This  
535 feedback prompted us to retain this program-level outcome even though it lacks accompanying  
536 course-level learning outcomes.

537

### 538 *Expanding Modeling*

539 The Vision and Change description of the “Ability to Use Modeling and Simulation” provides examples  
540 that emphasize the use of computational and mathematical models, such as “computational modeling of  
541 dynamic systems” and “incorporating stochasticity into biological models” (AAAS, 2011). From interviews  
542 and survey comments, we found that many participants likewise valued these skill sets, likely because  
543 they help prepare students for jobs (also see Durán & Marshall, 2018). However, many participants felt  
544 the definition of “modeling” should be expanded to include the use of conceptual models. This  
545 sentiment is supported by the K-12 STEM education literature, which establishes conceptual modeling as  
546 a foundational skill for doing science (NRC, 2012a; Passmore, Stewart, & Cartier, 2009; Svoboda &  
547 Passmore, 2013). Proponents of incorporating drawing into the undergraduate biology curriculum have  
548 made similar arguments to expand this competency (Quillin & Thomas, 2015). Moreover, building and  
549 interpreting conceptual models supports learning of other competencies and concepts, including data  
550 interpretation (Zagallo et al., 2016), study design (Hester et al., 2018), systems thinking (Dauer et al.,  
551 2013), and evolution (Speth et al., 2014). Given this expansion of the competency, we decided to revise  
552 the competency “title” accordingly. Throughout the project, we found that the phrase “Modeling and  
553 Simulation” triggered thoughts of computational and mathematical models, to the exclusion of other  
554 types of models. We have therefore revised the shorthand title of this competency to the simpler  
555 “Modeling” to emphasize the range of models (e.g., conceptual, physical, mathematical, computational  
556 (also see Diaz Eaton et al., 2019)) that can be used in college biology courses.

557

### 558 *Defining the Interdisciplinary Nature of Science*

559 Like Modeling, the “Ability to Tap into the Interdisciplinary Nature of Science” is a forward-looking  
560 competency. It represents the forefront of biological research, but not necessarily current practices in  
561 the majority of undergraduate biology classrooms. Elaborating it into learning outcomes therefore  
562 required additional work, including interviews with interdisciplinary biologists, examination of the  
563 literature (e.g., Gouvea, Sawtelle, Geller, & Turpen, 2013; NAE & NRC, 2014; Project Kaleidoscope,  
564 2011), and discussions at two round tables at national biology education research conferences. Since  
565 initiating this work, a framework has been presented for implementing this competency in

566 undergraduate biology education, including a working definition: “Interdisciplinary science is the  
567 collaborative process of integrating knowledge/expertise from trained individuals of two or more  
568 disciplines—leveraging various perspectives, approaches, and research methods/methodologies—to  
569 provide advancement beyond the scope of one discipline’s ability” (Tripp & Shortlidge, 2019). We  
570 believe this definition aligns well with the content of the Interdisciplinary Nature of Science learning  
571 outcomes in the final draft of the BioSkills Guide, especially in its emphasis on collaboration.  
572

### 573 *Expanding Communication & Collaboration*

574 The faculty team who composed the initial draft of the BioSkills Guide expanded the Communication &  
575 Collaboration competency significantly. First, they loosened the constraints implied by the title  
576 assigned by Vision and Change (“Ability to Communicate and Collaborate *with Other Disciplines*”) to  
577 encompass communication and collaboration with many types of people: other biologists, scientists in  
578 other disciplines, and non-scientists. This expansion was unanimously supported by participant  
579 feedback throughout the development phase and has been promoted in the literature (Brownell, Price,  
580 & Steinman, 2013; Mercer-Mapstone & Kuchel, 2017). Second, the drafting faculty included a program-  
581 level outcome relating to metacognition. Metacognition and other self-regulated learning skills were  
582 not included in the Vision and Change core competencies, but the majority of survey respondents  
583 nonetheless supported these outcomes. Some respondents raised concerns about the appropriateness  
584 of categorizing metacognition in this competency. However, since its inclusion was well-supported by  
585 qualitative and quantitative feedback and it was most directly connected with this competency, we  
586 have retained it here.  
587

### 588 **Next Steps for the Core Competencies**

589 The BioSkills Guide defines course- and program-level learning outcomes for the core competencies,  
590 but there is more work to be done to support backward design of competency teaching. Instructors  
591 will need to create lesson-level learning objectives that describe how competencies will be taught and  
592 assessed in the context of day-to-day class sessions. It is likely that a similar national-level effort to  
593 define lesson-level objectives would be particularly challenging because of the number of possible  
594 combinations of outcomes. First of all, most authentic scientific tasks (e.g., presenting data, building  
595 models of interdisciplinary phenomena, proposing solutions to real-world problems) require  
596 simultaneous use of multiple competencies. Second, instructors will need to define how core  
597 competencies interface with biology content and concepts. To this end, existing tools for interpreting  
598 the Vision and Change core concepts (Brownell, Freeman, et al., 2014; Cary & Branchaw, 2017) will be  
599 valuable companions to the BioSkills Guide, together providing a holistic view of national  
600 recommendations for the undergraduate biology curriculum.  
601

602 We view the complexities of combining concepts and competencies in daily learning objectives as a  
603 feature of the course planning process, allowing instructors to retain flexibility and creative freedom.  
604 Furthermore, one well-designed lesson can provide the opportunity to practice multiple concepts and  
605 competencies. For example, to model the process of cell respiration, students apply not only the skill of  
606 modeling but also conceptual understandings of systems and the transformation of matter and energy  
607 (Bergan-Roller et al., 2018; Dauer et al., 2013). The 3D Learning Assessment Protocol (Lavery et al.,  
608 2016), informed by the multidimensional design of the framework for K-12 science education (NRC,  
609 2012a), may be a valuable resource for considering these sorts of combinations. Several groups have

610 already begun proposing solutions to this work in the context of Vision and Change (Cary & Branchaw,  
611 2017; Dirks & Knight, 2016).

612

613 Another complexity to consider when planning core competency teaching is *at what point in the*  
614 *curriculum* competencies should be taught and *in what order*. Scaffolding competencies across course  
615 series or whole programs will require thoughtful reflection on the component parts of each skill and  
616 how students develop these skills over time. To assist in this work, there are a number of resources  
617 focusing on particular competencies (for example, see Angra & Gardner, 2016; Diaz-Martinez et al.,  
618 2019; Diaz Eaton et al., 2019; Pelaez et al., 2017; Quillin & Thomas, 2015; Tripp & Shortlidge, 2019;  
619 Wilson Sayres et al., 2018), all of which describe specific competencies in further detail than is  
620 contained in the BioSkills Guide. Additionally, work in K-12 education, and more recently higher  
621 education, developing learning progressions could guide future investigations of competency  
622 scaffolding (Scott, Wenderoth, & Doherty, 2019).

623

624 Given that over 50% of STEM majors attend a community college during their undergraduate career  
625 (NSF NCSES, 2010), yet less than 5% of biology education research studies include community college  
626 participation (Schinske et al., 2017), we were intentional about including community college faculty  
627 throughout the development and validation of the BioSkills Guide (Figure 3C, Supplemental Table 3).  
628 So, while the learning outcomes are calibrated to what a general biology major should be able to do by  
629 the end of a *four-year* degree, we were able to develop widely relevant outcomes by identifying  
630 connections between each competency and current teaching practices of two-year faculty.

631 Nonetheless, it remains an open question whether certain competencies should be emphasized at the  
632 introductory level, either because they are necessary prerequisites to upper-level work or because  
633 introductory biology may be a key opportunity to develop biological literacy for the many people who  
634 begin but do not end up completing a life sciences major. Discussions of how and when to teach  
635 competencies in introductory biology are ongoing (Kruchten et al., 2018). It will be essential that  
636 priorities, needs, and barriers for faculty from a range of institutional contexts, particularly community  
637 colleges, are considered in those discussions (Corwin, Kiser, LoRe, Miller, & Aikens, 2019).

638

### 639 **Applications of the BioSkills Guide**

640 The BioSkills Guide is intended to be a resource, not a prescription. We encourage educators to adapt  
641 the outcomes to align with their students' interests, needs, and current abilities. Reviewing the  
642 suggestions for additional learning outcomes made by national validation survey respondents  
643 (Supplemental Table 8) provides some preliminary insight into how educators may choose to revise the  
644 guide. For example, some respondents wished to increase the challenge level of particular outcomes  
645 (e.g., "use computational tools to analyze large datasets" rather than "describe how biologists answer  
646 research questions using... large datasets...") or to create more focused outcomes (e.g., "describe the  
647 ways scientific research has mistreated people from minority groups" rather than "...describe the  
648 broader societal impacts of biological research on different stakeholders"). Moreover, the content of  
649 the guide as a whole should be revisited and updated over time, as educator perceptions will evolve in  
650 response to the changing nature of biology and the scientific job market.

651

652 We envision many applications of the BioSkills Guide across curricular scales (Figure 5). The guide  
653 intentionally contains a two-tiered structure, with program-level learning outcomes that are intended



654 to be completed by the end of a four-year degree and course-level learning outcomes that are smaller  
655 in scale and more closely resemble outcomes listed on a course syllabus. The program-level learning  
656 outcomes could serve as a framework for curriculum mapping, allowing departments to document  
657 which courses teach which competencies and subsequently identify program strengths, redundancies,  
658 and gaps. These data can then inform a variety of departmental tasks, including allocating funds for  
659 development of new courses, re-evaluating degree requirements, assembling evidence for  
660 accreditation, and selecting and implementing programmatic assessments. Course-level learning  
661 outcomes can spark more informed discussions about particular program-level outcomes, and will  
662 likely be valuable in discussions of articulation and transfer across course levels.

663  
664 Course-level learning outcomes can additionally be used for backward design of individual courses.  
665 It can be immensely clarifying to move from broader learning goals such as “Students will be able to  
666 communicate” to concrete learning outcomes such as “Students will be able to use a variety of modes  
667 to communicate science (e.g., oral, written, visual).” Furthermore, the outcomes and their aligned  
668 example activities included in the Expanded BioSkills Guide (Supplemental Materials) can be used for  
669 planning new lessons and for recognizing skills that are already included in a particular class. Examples  
670 such as “write blogs, essays, papers, or pamphlets to communicate findings”, “present data as  
671 infographics”, and “give mini-lectures in the classroom” help emphasize the range of ways  
672 communication may occur in the classroom. Once clear learning outcomes have been defined, they can  
673 be shared with students to explain the purpose of various activities and assignments and increase  
674 transparency in instructor expectations. This may help students develop expert-like values for skills  
675 development (Marbach-Ad, Hunt, & Thompson, 2019) and encourage them to align their time and  
676 effort with faculty priorities.

677  
678 The BioSkills learning outcomes may be especially relevant for the design of high-impact practices, such  
679 as course-based undergraduate research experiences, service learning, and internships (Auchincloss et  
680 al., 2014; Brownell & Kloser, 2015; Kuh, 2008), which already emphasize skill building, but often are not  
681 developed using backward design (Cooper et al., 2017). In these cases, there is a risk of misalignment  
682 between instructor intentions, in-class activities, and assessments (Wiggins & McTighe, 1998). One  
683 possible reason for the lack of backward design in these cases is that writing clear, measurable learning  
684 outcomes can be challenging and time-consuming. We hope the BioSkills Guide will allow instructors to  
685 more quickly formulate learning outcomes, freeing up time for the subsequent steps of backward  
686 design (i.e. designing summative and formative assessments and planning instruction).

687  
688 Assessment is an essential part of evidence-based curriculum review. For some competencies, such as  
689 Process of Science, a number of high-quality assessments have been developed (for example,  
690 (Brownell, Wenderoth, et al., 2014; Dasgupta, Anderson, & Pelaez, 2014; Deane, Nomme, Jeffery,  
691 Pollock, & Birol, 2016; Gormally et al., 2012; Sirum & Humburg, 2011; Timmerman et al., 2011); for a  
692 general discussion of assessing CUREs see (Shortlidge & Brownell, 2016)). However, substantial gaps  
693 remain in the availability of assessments for most other competencies. The BioSkills Guide could be  
694 used as a framework for assessment development. As an analogy, the BioCore Guide was used to  
695 develop a suite of programmatic conceptual assessments intentionally aligned with Vision and Change  
696 core concepts (Smith et al., 2019). Given the difficulty of assessing particular competencies (e.g.,  
697 collaboration) with fixed choice or even written response questions, it is unlikely that a single

698 assessment could be designed to cover all six competencies. However, by aligning currently available  
699 competency assessments with the BioSkills Guide, outcomes lacking aligned assessments will become  
700 apparent and point to areas in need of future work.

701

702 While motivations and paths for implementing the BioSkills Guide will vary by department or  
703 instructor, the end goal remains the same: better integration of competency teaching in  
704 undergraduate biology education. With more intentional and effective skills training, biology graduates  
705 will be more fully prepared for their next steps, whether those steps are in biology, STEM more  
706 generally, or outside of STEM completely. The six core competencies encompass essential skills needed  
707 in competitive careers and also in the daily life of a scientifically literate citizen. We have developed  
708 and gathered validity evidence for the BioSkills Guide with input from a diverse group of biology  
709 educators to ensure value for courses in a variety of subdisciplines and levels, and biology departments  
710 at a variety of institution types. Thus, we hope the BioSkills Guide will help facilitate progress in  
711 meeting the recommendations of Vision and Change with the long-term goal of preparing students for  
712 modern careers.

713

714

715

#### ACKNOWLEDGMENTS

716 This project was funded by the National Science Foundation (DUE 1710772). We thank the UW  
717 Department of Biology Undergraduate Program Committee for providing the initial draft of learning  
718 outcomes that were used to develop the BioSkills Guide. Thank you to Sara Brownell, Jenny McFarland,  
719 Erika Offerdahl, Pamela Pape-Lindstrom, and the UW Biology Education Research Group for their  
720 continued feedback and assistance throughout this project. We additionally thank Jess Blum, Jeremy  
721 Bradford, Lisa Corwin, Alex Doetsch, Deb Donovan, Jenny Loertscher, Kelly McDonald, Jeff Schinske,  
722 and Kimberly Tanner for help recruiting survey participants. We thank Jennifer Doherty and Mary Pat  
723 Wenderoth for evaluating the aligned examples, Emily Scott and Sara Brownell for constructive  
724 feedback on an early version of this manuscript, and Elli Theobald for consultations on statistical  
725 methods. Finally, we appreciate the time and expertise of the many biologists and biology educators  
726 who provided feedback on the BioSkills Guide.

## REFERENCES

- 727  
728  
729 AAAS. (2011). *Vision and change in undergraduate biology education: A call to action*. Washington, D.C.  
730 Retrieved from [visionandchange.org](http://visionandchange.org)  
731 AAAS. (2019). *Levers for change: An assessment of progress on changing STEM instruction*.  
732 Washington, D.C. Retrieved from [https://www.aaas.org/resources/levers-change-assessment-](https://www.aaas.org/resources/levers-change-assessment-progress-changing-stem-instruction)  
733 [progress-changing-stem-instruction](https://www.aaas.org/resources/levers-change-assessment-progress-changing-stem-instruction)  
734 Angra, A., & Gardner, S. (2016). Development of a framework for graph choice and construction.  
735 *Advances in Physiology Education*, 40(1). <https://doi.org/10.1152/advan.00152.2015>  
736 Arnold, J. (2019). ggthemes: Extra themes, scales and geoms for “ggplot2.” R package version 4.2.0.  
737 Retrieved from <https://cran.r-project.org/package=ggthemes>  
738 Association of College and Research Libraries. (2015). *Framework for information literacy for higher*  
739 *education*. Chicago, IL: American Library Association. Retrieved from  
740 <http://www.ala.org/acrl/standards/ilframework>  
741 Auchincloss, L. C., Laursen, S. L., Branchaw, J. L., Eagan, K., Graham, M., Hanauer, D. I., ... Dolan, E. J.  
742 (2014). Assessment of course-based undergraduate research experiences: A meeting report. *CBE*  
743 *Life Sciences Education*, 13(1), 29–40. <https://doi.org/10.1187/cbe.14-01-0004>  
744 Bayer Corporation. (2014). The Bayer facts of science education XVI: US STEM workforce shortage-  
745 myth or reality? Fortune 1000 talent recruiters on the debate. *Journal of Science Education and*  
746 *Technology*, 23(5), 617–623. <https://doi.org/10.1007/s10956-014-9501-0>  
747 Bergan-Roller, H. E., Galt, N. J., Chizinski, C. J., Helikar, T., & Dauer, J. T. (2018). Simulated  
748 computational model lesson improves foundational systems thinking skills and conceptual  
749 knowledge in biology students. *BioScience*, 68(8), 612–621. <https://doi.org/10.1093/biosci/biy054>  
750 Bierema, A. M.-K., Schwarz, C. V., & Stoltzfus, J. R. (2017). Engaging undergraduate biology students in  
751 scientific modeling: Analysis of group interactions, sense-making, and justification. *CBE Life*  
752 *Sciences Education*, 16(4), ar68. <https://doi.org/10.1187/cbe.17-01-0023>  
753 Brownell, S. E., Freeman, S., Wenderoth, M. P., & Crowe, A. J. (2014). BioCore Guide: A tool for  
754 interpreting the core concepts of vision and change for biology majors. *CBE Life Sciences*  
755 *Education*, 13(2), 200–211. <https://doi.org/10.1187/cbe.13-12-0233>  
756 Brownell, S. E., & Kloser, M. (2015). Toward a conceptual framework for measuring the effectiveness of  
757 course-based undergraduate research experiences in undergraduate biology. *Studies in Higher*  
758 *Education*, 40(3), 525–544. <https://doi.org/10.1080/03075079.2015.1004234>  
759 Brownell, S. E., Price, J. V., & Steinman, L. (2013). Science communication to the general public: Why we  
760 need to teach undergraduate and graduate students this skill as part of their formal scientific  
761 training. *Journal of Undergraduate Neuroscience Education*, 12(1). Retrieved from  
762 <http://www.ncbi.nlm.nih.gov/pubmed/24319399>  
763 Brownell, S. E., Wenderoth, M. P., Theobald, R., Okoroafor, N., Koval, M., Freeman, S., ... Crowe, A. J.  
764 (2014). How students think about experimental design: Novel conceptions revealed by in-class  
765 activities. *BioScience*, 64(2), 125–137. <https://doi.org/10.1093/biosci/bit016>  
766 Camilli, G., & Hira, R. (2019). Introduction to special issue—STEM workforce: STEM education and the  
767 post-scientific society. *Journal of Science Education and Technology*, 28(1), 1–8.  
768 <https://doi.org/10.1007/s10956-018-9759-8>  
769 Cappelli, P. H. (2015). Skill gaps, skill shortages, and skill mismatches. *ILR Review*, 68(2), 251–290.  
770 <https://doi.org/10.1177/0019793914564961>

- 771 Cary, T., & Branchaw, J. (2017). Conceptual elements: A detailed framework to support and assess  
772 student learning of biology core concepts. *CBE Life Sciences Education*, 16(2), 1–10.  
773 <https://doi.org/10.1187/cbe.16-10-0300>
- 774 Coil, D., Wenderoth, M. P., Cunningham, M., & Dirks, C. (2010). Teaching the process of science:  
775 Faculty perceptions and an effective methodology. *CBE Life Sciences Education*, 9(4), 524–535.  
776 <https://doi.org/10.1187/cbe.10-01-0005>
- 777 Cole, R., Lantz, J. M., Ruder, S., Reynders, G. J., & Stanford, C. (2018). Board 25: Enhancing learning by  
778 assessing more than content knowledge. In *Paper presented at 2018 ASEE Annual Conference &*  
779 *Exposition*. Salt Lake City, UT. Retrieved from <https://peer.asee.org/29991>
- 780 Cooper, K. M., Soneral, P. A. G., & Brownell, S. E. (2017). Define your goals before you design a CURE: A  
781 call to use backward design in planning course-based undergraduate research experiences.  
782 *Journal of Microbiology & Biology Education*, 18(2). <https://doi.org/10.1128/jmbe.v18i2.1287>
- 783 Corwin, L. A., Kiser, S., LoRe, S. M., Miller, J. M., & Aikens, M. L. (2019). Community college instructors’  
784 perceptions of constraints and affordances related to teaching quantitative biology skills and  
785 concepts. *CBE—Life Sciences Education*, 18(4), ar64. <https://doi.org/10.1187/cbe.19-01-0003>
- 786 Dasgupta, A. P., Anderson, T. R., & Pelaez, N. (2014). Development and validation of a rubric for  
787 diagnosing students’ experimental design knowledge and difficulties. *CBE Life Sciences Education*,  
788 13(2), 265–284. <https://doi.org/10.1187/cbe.13-09-0192>
- 789 Dauer, J. T., Momsen, J. L., Speth, E. B., Makohon-Moore, S. C., & Long, T. M. (2013). Analyzing change  
790 in students’ gene-to-evolution models in college-level introductory biology. *Journal of Research in*  
791 *Science Teaching*, 50(6), 639–659. <https://doi.org/10.1002/tea.21094>
- 792 Deane, T., Nomme, K., Jeffery, E., Pollock, C., & Birol, G. (2016). Development of the Statistical  
793 Reasoning in Biology Concept Inventory (SRBCI). *CBE Life Sciences Education*, 15(1), ar5.  
794 <https://doi.org/10.1187/cbe.15-06-0131>
- 795 Diaz-Martinez, L. A., Fisher, G. R., Esparza, D., Bhatt, J. M., D’Arcy, C. E., Apodaca, J., ... Olimpo, J. T.  
796 (2019). Recommendations for effective integration of ethics and responsible conduct of research  
797 (E/RCR) education into course-based undergraduate research experiences: A meeting report. *CBE*  
798 *Life Sciences Education*, 18(2), mr2. <https://doi.org/10.1187/cbe.18-10-0203>
- 799 Diaz Eaton, C., Highlander, H. C., Dahlquist, K. D., Ledder, G., LaMar, M. D., & Schugart, R. C. (2019). A  
800 “rule-of-five” framework for models and modeling to unify mathematicians and biologists and  
801 improve student learning. *PRIMUS*, 1–31. <https://doi.org/10.1080/10511970.2018.1489318>
- 802 Dillman, D. A., Smyth, J. D., & Christian, L. M. (2014). *Internet, phone, mail, and mixed-mode surveys:*  
803 *The tailored design method* (4th ed.). Hoboken, NJ: John Wiley & Sons Inc.
- 804 Dirks, C., & Knight, J. K. (2016). Measuring college learning in biology. In R. Arum, J. Roksa, & A. Cook  
805 (Eds.), *Improving quality in American higher education: Learning outcomes and assessments for*  
806 *the 21st century* (pp. 225–260). San Francisco, CA: Jossey-Bass. Retrieved from  
807 <http://higherred.ssrc.org/wp-content/uploads/MCL-in-Biology.pdf>
- 808 Durán, P. A., & Marshall, J. A. (2018). Mathematics for biological sciences undergraduates: A needs  
809 assessment. *International Journal of Mathematical Education in Science and Technology*, 1–18.  
810 <https://doi.org/10.1080/0020739X.2018.1537451>
- 811 Gormally, C., Brickman, P., & Lutz, M. (2012). Developing a Test of Scientific Literacy Skills (TOSLS):  
812 measuring undergraduates’ evaluation of scientific information and arguments. *CBE Life Sciences*  
813 *Education*, 11(4), 364–377. <https://doi.org/10.1187/cbe.12-03-0026>
- 814 Gouvea, J., Sawtelle, V., Geller, B., & Turpen, C. (2013). A framework for analyzing interdisciplinary

- 815 tasks: Implications for student learning and curricular design. *CBE Life Sciences Education*, 12(2),  
816 187–205. <https://doi.org/10.1187/cbe.12-08-0135>
- 817 Grunspan, D. Z., Kline, M. A., & Brownell, S. E. (2018). The lecture machine: A cultural evolutionary  
818 model of pedagogy in higher education. *CBE Life Sciences Education*, 17(3), es6.  
819 <https://doi.org/10.1187/cbe.17-12-0287>
- 820 Hart Research Associates. (2018). *Fulfilling the American dream: Liberal education and the future of*  
821 *work*. Washington, D.C.: Association of American Colleges and Universities. Retrieved from  
822 <https://www.aacu.org/sites/default/files/files/LEAP/2018EmployerResearchReport.pdf>
- 823 Hester, S. D., Nadler, M., Katcher, J., Elfring, L. K., Dykstra, E., Rezende, L. F., & Bolger, M. S. (2018).  
824 Authentic Inquiry through Modeling in Biology (AIM-Bio): An introductory laboratory curriculum  
825 that increases undergraduates' scientific agency and skills. *CBE Life Sciences Education*, 17(4),  
826 ar63. <https://doi.org/10.1187/cbe.18-06-0090>
- 827 Hora, M. T. (2018). Beyond the skills gap: How the vocationalist framing of higher education  
828 undermines student, employer, and societal interests. Retrieved June 27, 2018, from  
829 <https://www.aacu.org/liberaleducation/2018/spring/hora>
- 830 Indiana University Center for Postsecondary Research. (2016). Carnegie Classifications 2015 public data  
831 file. Retrieved April 21, 2019, from [http://carnegieclassifications.iu.edu/downloads/CCIHE2015-](http://carnegieclassifications.iu.edu/downloads/CCIHE2015-PublicDataFile.xlsx)  
832 [PublicDataFile.xlsx](http://carnegieclassifications.iu.edu/downloads/CCIHE2015-PublicDataFile.xlsx)
- 833 Kahle, D., & Wickham, H. (2013). ggmap: Spatial visualization with ggplot2. *The R Journal*. Retrieved  
834 from <http://journal.r-project.org/archive/2013-1/kahle-wickham.pdf>
- 835 Kassambara, A. (2018). ggpubr: “ggplot2” based publication ready plots. R package version 0.2.
- 836 Kjellvik, M. K., & Schultheis, E. H. (2019). Getting messy with authentic data: Exploring the potential of  
837 using data from scientific research to support student data literacy. *CBE Life Sciences Education*,  
838 18(2), es2. <https://doi.org/10.1187/cbe.18-02-0023>
- 839 Kruchten, A., Baumgartner, E., Beadles-Bohling, A., Brown, J., Duncan, J., Kayes, L., ... Tillberg, C. (2018).  
840 A network approach to vertical transfer and articulation for student success in biology: A fourth  
841 workshop hosted by the Northwest Biosciences Consortium RCN-UBE. In *The FASEB Journal*.  
842 Retrieved from [https://www.fasebj.org/doi/abs/10.1096/fasebj.2018.32.1\\_supplement.535.11](https://www.fasebj.org/doi/abs/10.1096/fasebj.2018.32.1_supplement.535.11)
- 843 Kuh, G. D. (2008). *High-impact educational practices: What they are, who has access to them, and why*  
844 *they matter*. Washington, D.C.: Association of American Colleges and Universities. Retrieved from  
845 <https://secure.aacu.org/imis/ItemDetail?iProductCode=E-HIGHIMP&Category=>
- 846 Landivar, L. C. (2013). The relationship between science and engineering education and employment in  
847 STEM occupations. *American Community Survey Reports*. Retrieved from [www.bls.gov/soc](http://www.bls.gov/soc)
- 848 Lavery, J. T., Underwood, S. M., Matz, R. L., Posey, L. A., Carmel, J. H., Caballero, M. D., ... Cooper, M.  
849 M. (2016). Characterizing college science assessments: The three-dimensional learning  
850 assessment protocol. *PLOS ONE*, 11(9), e0162333. <https://doi.org/10.1371/journal.pone.0162333>
- 851 Luckie, D., Harrison, S. H., & Ebert-May, D. (2011). Model-based reasoning: Using visual tools to reveal  
852 student learning. *Advances in Physiology Education*, 35(59–67).  
853 <https://doi.org/10.1152/advan.00016.2010>
- 854 Marbach-Ad, G., Hunt, C., & Thompson, K. V. (2019). Exploring the values undergraduate students  
855 attribute to cross-disciplinary skills needed for the workplace: An analysis of five STEM disciplines.  
856 *Journal of Science Education and Technology*, 28(5), 452–469. [https://doi.org/10.1007/s10956-](https://doi.org/10.1007/s10956-019-09778-8)  
857 [019-09778-8](https://doi.org/10.1007/s10956-019-09778-8)
- 858 Mercer-Mapstone, L., & Kuchel, L. (2017). Core skills for effective science communication: A teaching

- 859 resource for undergraduate science education. *International Journal of Science Education, Part B*,  
860 7(2), 181–201. <https://doi.org/10.1080/21548455.2015.1113573>
- 861 NACE. (2018). Employers want to see these attributes on students' resumes. Retrieved August 27,  
862 2019, from <https://www.nacweb.org/talent-acquisition/candidate-selection/employers-want-to-see-these-attributes-on-students-resumes/>
- 863
- 864 NAE, & NRC. (2014). *STEM integration in K-12 education: Status, prospects, and an agenda for*  
865 *research*. (M. Honey, G. Pearson, & H. Schweingruber, Eds.). National Academies Press.  
866 <https://doi.org/10.17226/18612>
- 867 NASEM. (2016). *Developing a national STEM workforce strategy: A workshop summary*. Washington,  
868 DC: The National Academies Press. <https://doi.org/10.17226/21900>
- 869 NASEM. (2017). *Undergraduate research experiences for STEM students: Successes, challenges, and*  
870 *opportunities*. Washington, D.C.: The National Academies Press. <https://doi.org/10.17226/24622>
- 871 NRC. (2003). *BIO2010: Transforming undergraduate education for future research biologists*.  
872 Washington, DC: The National Academies Press. <https://doi.org/10.17226/10497>
- 873 NRC. (2012a). *A framework for K-12 science education: Practices, crosscutting concepts, and core ideas*.  
874 Washington, D.C.: The National Academies Press. <https://doi.org/10.17226/13165>
- 875 NRC. (2012b). *Education for life and work: Developing transferable knowledge and skills in the 21st*  
876 *century*. Washington, DC: National Academies Press. <https://doi.org/10.17226/13398>
- 877 NSF NCSES. (2010). Characteristics of recent science and engineering graduates: 2010. Retrieved  
878 August 27, 2019, from <http://ncesdata.nsf.gov/recentgrads/>
- 879 Passmore, C., Stewart, J., & Cartier, J. (2009). Model-based inquiry and school science: Creating  
880 connections. *School Science and Mathematics, 109*(7), 394–402. [https://doi.org/10.1111/j.1949-](https://doi.org/10.1111/j.1949-8594.2009.tb17870.x)  
881 [8594.2009.tb17870.x](https://doi.org/10.1111/j.1949-8594.2009.tb17870.x)
- 882 Pelaez, N., Anderson, T., Gardner, S., Yin, Y., Abraham, J., Bartlett, E., ... Stevens, M. (2017, January 6).  
883 The basic competencies of biological experimentation: Concept-skill statements. Retrieved  
884 December 14, 2018, from <https://docs.lib.purdue.edu/pibergiim/4>
- 885 Pew Research Center. (2016). The value of a college education. In *The state of American jobs: How the*  
886 *shifting economic landscape is reshaping work and society and affecting the way people think*  
887 *about the skills and training they need to get ahead*. Retrieved from  
888 <https://www.pewsocialtrends.org/2016/10/06/5-the-value-of-a-college-education/>
- 889 Project Kaleidoscope. (2011). *What works in facilitating interdisciplinary learning in science and*  
890 *mathematics*. Washington, D.C.: Association of American Colleges and Universities.  
891 <https://doi.org/10.2307/3192150>
- 892 Quillin, K., & Thomas, S. (2015). Drawing-to-learn: A framework for using drawings to promote model-  
893 based reasoning in biology. *CBE Life Sciences Education, 14*(1), es2.  
894 <https://doi.org/10.1187/cbe.14-08-0128>
- 895 R Core Team. (2018). R: A language and environment for statistical computing. *R Foundation for*  
896 *Statistical Computing*. Vienna, Austria. Retrieved from <https://www.r-project.org/>
- 897 Ram, K., & Wickham, H. (2018). wesanderson: A Wes Anderson Palette Generator. R package version  
898 0.3.6. Retrieved from <https://cran.r-project.org/package=wesanderson>
- 899 Raudenbush, S. W., & Bryk, A. S. (2002). *Hierarchical linear models: Applications and data analysis*  
900 *methods*. SAGE.
- 901 Rhodes, T. (2010). *Assessing outcomes and improving achievement: Tips and tools for using rubrics*.  
902 Washington, D.C.: Association of American Colleges and Universities.

- 903 Schinske, J. N., Balke, V. L., Bangera, M. G., Bonney, K. M., Brownell, S. E., Carter, R. S., ... Corwin, L. A.  
904 (2017). Broadening participation in biology education research: Engaging community college  
905 students and faculty. *CBE Life Sciences Education*, 16(2), mr1. [https://doi.org/10.1187/cbe.16-10-](https://doi.org/10.1187/cbe.16-10-0289)  
906 0289
- 907 Scott, E. E., Wenderoth, M. P., & Doherty, J. H. (2019). Learning progressions: An empirically grounded,  
908 learner-centered framework to guide biology instruction. *CBE Life Sciences Education*, 18(4), es5.  
909 <https://doi.org/10.1187/cbe.19-03-0059>
- 910 Shortlidge, E. E., & Brownell, S. E. (2016). How to assess your CURE: A practical guide for instructors of  
911 course-based undergraduate research experiences. *Journal of Microbiology & Biology Education*,  
912 17(3), 399–408. <https://doi.org/10.1128/jmbe.v17i3.1103>
- 913 Sirum, K., & Humburg, J. (2011). The Experimental Design Ability Test (EDAT). *Bioscene: Journal of*  
914 *College Biology Teaching*, 8(371), 8–16. Retrieved from  
915 <http://files.eric.ed.gov/fulltext/EJ943887.pdf>
- 916 Smith, M. K., Brownell, S. E., Crowe, A. J., Holmes, N. G., Knight, J. K., Semsar, K., ... Couch, B. A. (2019).  
917 Tools for change: Measuring student conceptual understanding across undergraduate biology  
918 programs using Bio-MAPS assessments. *Journal of Microbiology & Biology Education*, 20(2).  
919 <https://doi.org/10.1128/jmbe.v20i2.1787>
- 920 Speth, E. B., Shaw, N., Momsen, J., Reinagel, A., Le, P., Taqieddin, R., & Long, T. (2014). Introductory  
921 biology students' conceptual models and explanations of the origin of variation. *CBE Life Sciences*  
922 *Education*, 13(3), 529–539. <https://doi.org/10.1187/cbe.14-02-0020>
- 923 Stanhope, L., Ziegler, L., Haque, T., Le, L., Vincens, M., Davis, G. K., ... Overvoorde, P. J. (2017).  
924 Development of a Biological Science Quantitative Reasoning Exam (BioSQuaRE). *CBE Life Sciences*  
925 *Education*, 16(4), ar66. <https://doi.org/10.1187/cbe.16-10-0301>
- 926 Strada Education Network. (2018). *Why higher ed? Top reasons U.S. consumers choose their*  
927 *educational pathways*. Gallup, Inc. Retrieved from  
928 [https://cdn2.hubspot.net/hubfs/5257787/Gallup-WhyHigherEd/Strada\\_Gallup\\_January-2018-](https://cdn2.hubspot.net/hubfs/5257787/Gallup-WhyHigherEd/Strada_Gallup_January-2018-Why-Higher-Ed-Report.pdf?utm_campaign=GallupReport%3AWhyHigherEd&utm_medium=email&_hsenc=p2ANqtz--6ieBV4NiAqSSnDZHWmFWNuW_Y_eO7EY3zcMc6fCVhKvK37I3hos)  
929 [Why-Higher-Ed-Report.pdf?utm\\_campaign=Gallup Report%3A Why Higher](https://cdn2.hubspot.net/hubfs/5257787/Gallup-WhyHigherEd/Strada_Gallup_January-2018-Why-Higher-Ed-Report.pdf?utm_campaign=GallupReport%3AWhyHigherEd&utm_medium=email&_hsenc=p2ANqtz--6ieBV4NiAqSSnDZHWmFWNuW_Y_eO7EY3zcMc6fCVhKvK37I3hos)  
930 [Ed&utm\\_medium=email&\\_hsenc=p2ANqtz--](https://cdn2.hubspot.net/hubfs/5257787/Gallup-WhyHigherEd/Strada_Gallup_January-2018-Why-Higher-Ed-Report.pdf?utm_campaign=GallupReport%3AWhyHigherEd&utm_medium=email&_hsenc=p2ANqtz--6ieBV4NiAqSSnDZHWmFWNuW_Y_eO7EY3zcMc6fCVhKvK37I3hos)  
931 [6ieBV4NiAqSSnDZHWmFWNuW\\_Y\\_eO7EY3zcMc6fCVhKvK37I3hos](https://cdn2.hubspot.net/hubfs/5257787/Gallup-WhyHigherEd/Strada_Gallup_January-2018-Why-Higher-Ed-Report.pdf?utm_campaign=GallupReport%3AWhyHigherEd&utm_medium=email&_hsenc=p2ANqtz--6ieBV4NiAqSSnDZHWmFWNuW_Y_eO7EY3zcMc6fCVhKvK37I3hos)
- 932 Strauss, V. (2017). The surprising thing Google learned about its employees — and what it means for  
933 today's students. Retrieved July 4, 2019, from [http://wapo.st/2kPG7vX?tid=ss\\_tw](http://wapo.st/2kPG7vX?tid=ss_tw)
- 934 Svoboda, J., & Passmore, C. (2013). The strategies of modeling in biology education. *Science &*  
935 *Education*, 22(1), 119–142. <https://doi.org/10.1007/s11191-011-9425-5>
- 936 Timmerman, B. E. C., Strickland, D. C., Johnson, R. L., & Payne, J. R. (2011). Development of a  
937 “universal” rubric for assessing undergraduates' scientific reasoning skills using scientific writing.  
938 *Assessment & Evaluation in Higher Education*, 36(5), 509–547.  
939 <https://doi.org/10.1080/02602930903540991>
- 940 Tripp, B., & Shortlidge, E. E. (2019). A framework to guide undergraduate education in interdisciplinary  
941 science. *CBE Life Sciences Education*, 18(2), es3. <https://doi.org/10.1187/cbe.18-11-0226>
- 942 Twenge, J. M., & Donnelly, K. (2016). Generational differences in American students' reasons for going  
943 to college, 1971–2014: The rise of extrinsic motives. *The Journal of Social Psychology*, 156(6), 620–  
944 629. <https://doi.org/10.1080/00224545.2016.1152214>
- 945 Understanding Science. (2016). How science works flowchart. Retrieved from  
946 <http://www.understandingscience.org>

- 947 Wickham, H. (2016). tidyverse: Easily install and load the “Tidyverse”. *R Package Version 1.2.1*.  
948 Retrieved from <https://cran.r-project.org/package=tidyverse>
- 949 Wiggins, G., & McTighe, J. (1998). What is backward design? In *Understanding by Design* (pp. 7–19).  
950 <https://doi.org/10.1016/j.cie.2006.03.005>
- 951 Wilson Sayres, M. A., Hauser, C., Sierk, M., Robic, S., Rosenwald, A. G., Smith, T. M., ... Pauley, M. A.  
952 (2018). Bioinformatics core competencies for undergraduate life sciences education. *PLOS ONE*,  
953 *13*(6), e0196878. <https://doi.org/10.1371/journal.pone.0196878>
- 954 Zagallo, P., Meddleton, S., & Bolger, M. S. (2016). Teaching Real Data Interpretation with Models  
955 (TRIM): Analysis of student dialogue in a large-enrollment cell and developmental biology course.  
956 *CBE Life Sciences Education*, *15*(2), ar17. <https://doi.org/10.1187/cbe.15-11-0239>  
957  
958



959  
960

## FIGURE LEGENDS

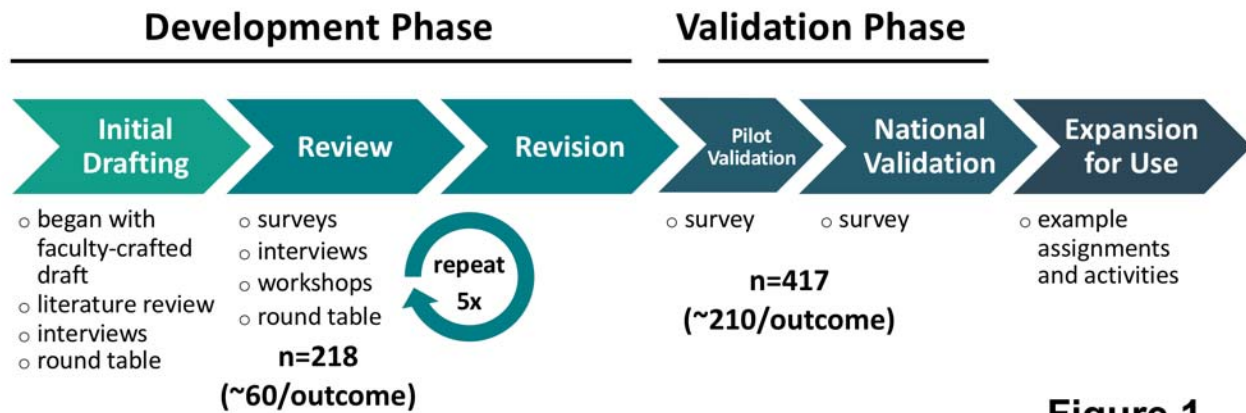

**Figure 1**

961  
962  
963  
964  
965  
966  
967

**Figure 1. BioSkills Guide methods overview.**

Initial drafting included all work to generate BioSkills Guide Version I. Five rounds of review and revision were carried out on Versions I-V. Pilot validation evaluated Version VI. National validation evaluated final version of BioSkills Guide.

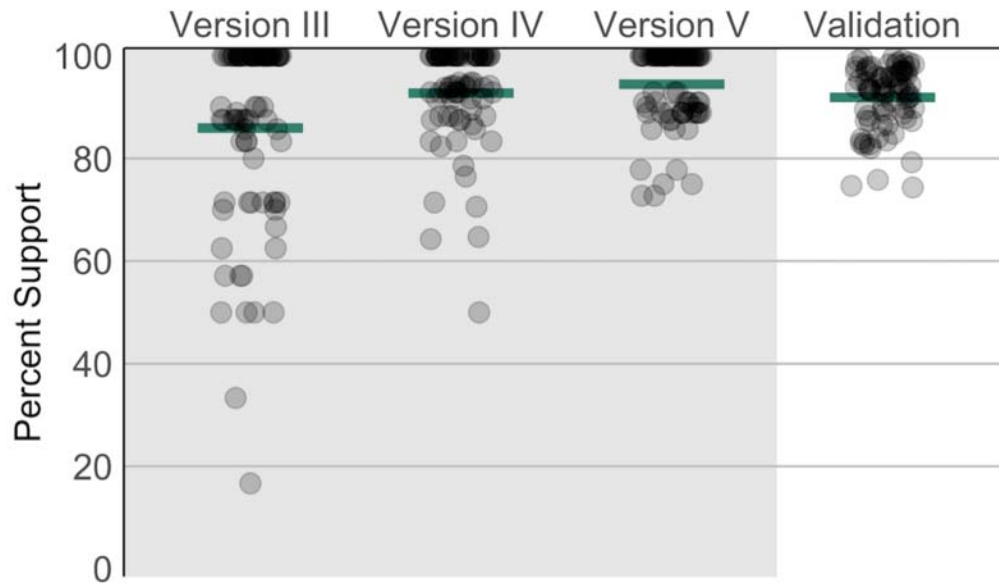

**Figure 2**

968

969

**Figure 2. Learning outcome ratings show increasing consensus over iterative rounds of revision.**

970

Survey ratings were summarized by calculating the percent of respondents who selected 'Important' or 'Very

971

Important' for each outcome (i.e. Percent Support). Ratings from pilot and national validation surveys were

972

combined. Each circle represents a single learning outcome. Horizontal lines indicate means across all outcomes

973

from that survey. Points are jittered to reveal distribution. This data is represented in tabular form in Table 3.

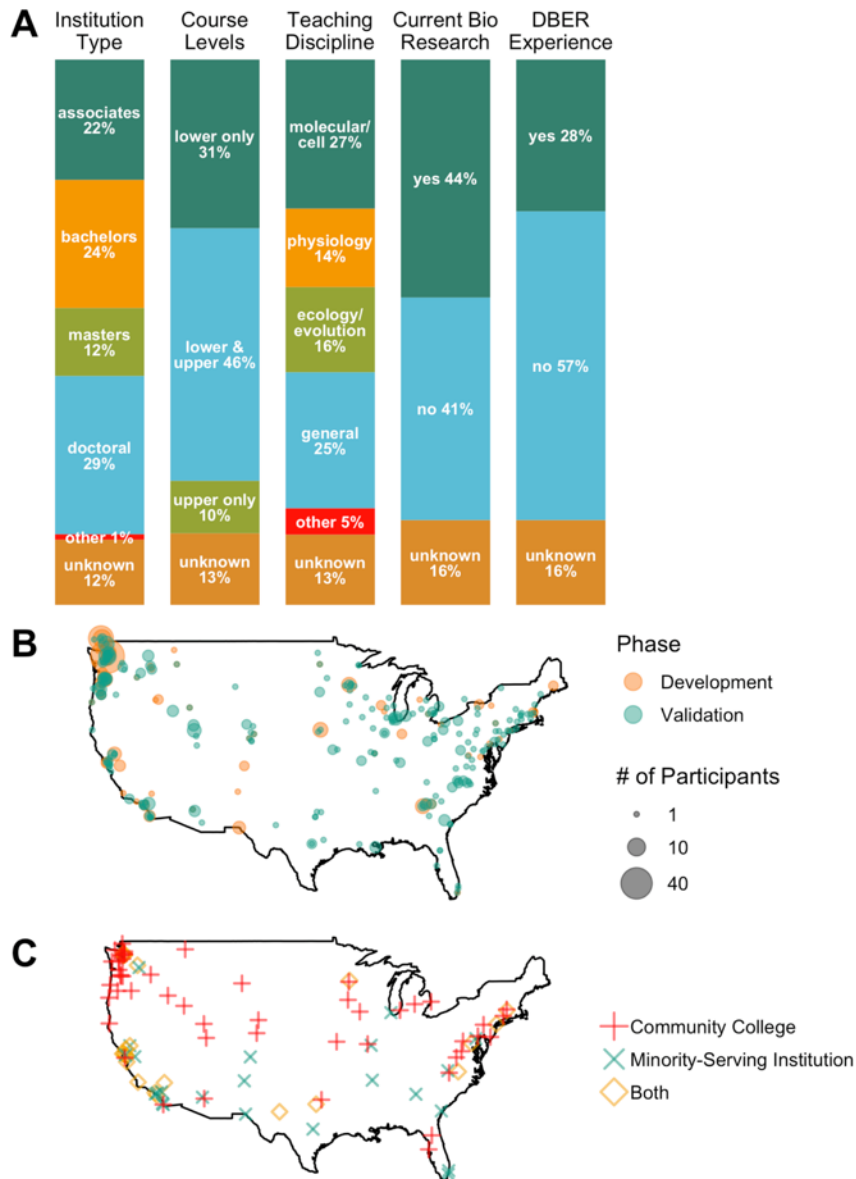

**Figure 3**

974

975

**Figure 3. BioSkills Guide development and validation participants spanned a range of institution types, expertise, and geographic locations.**

976

**(A) Self-reported demographics of validation phase survey respondents (n=417).** Current engagement in disciplinary biology research was inferred from field of current research. Experience in Discipline-Based Education Research (DBER) was inferred from fields of current research and graduate training. **(B) Geographic distribution of participants.** 263 unique institutions, representing 556 participants with known institutions. Size is proportional to the number of participants from that institution. Only institutions in the continental US and British Columbia are shown. Additional participants came from Alaska, Alberta, Hawaii, India, Puerto Rico, and Scotland (8 institutions). **(C) Geographic distribution of participants from community colleges and minority-serving institutions.** 73 unique community colleges and 49 unique minority-serving institutions (46 shown, not shown: MSIs in Alaska and Puerto Rico). 23 institutions were classified as both community colleges and minority-serving institutions.

977

978

979

980

981

982

983

984

985

986

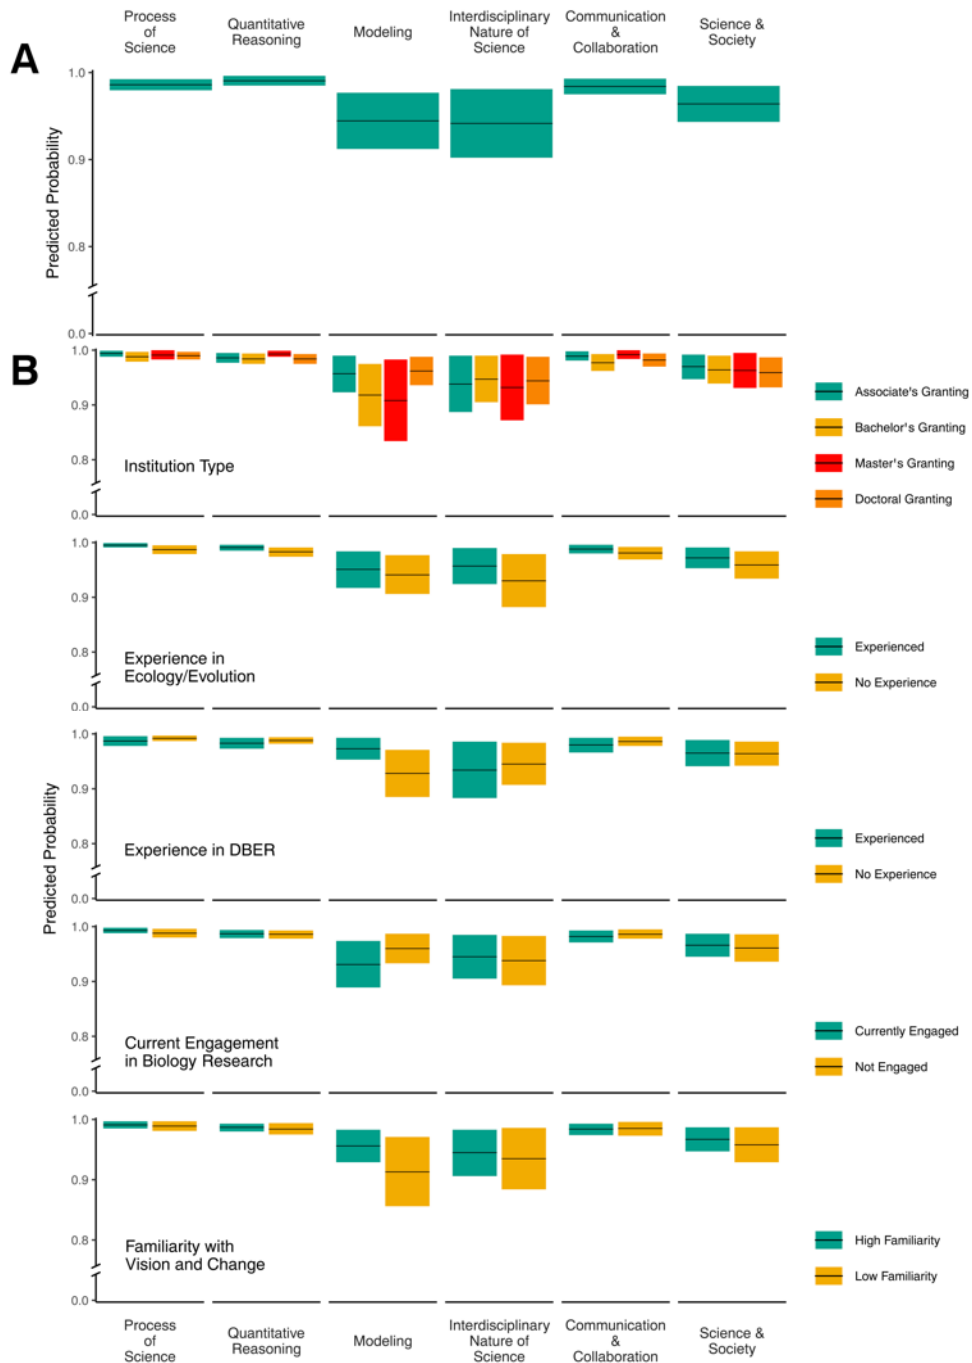

**Figure 4**

987

988

989

**Figure 4. Competency and respondent demographics have significant but small effects on learning outcome support.**

990

Predicted probabilities of a respondent supporting (i.e. rating 'Important' or 'Very Important') a learning outcome in the indicated competency for (A) all respondents or (B) respondents in various demographic groups. Predicted probabilities were calculated using multi-level, generalized linear models (see Methods and Supplemental Materials for details). Colored rectangles represent 95% confidence intervals. Note that y-axis has been truncated.

991

992

993

994

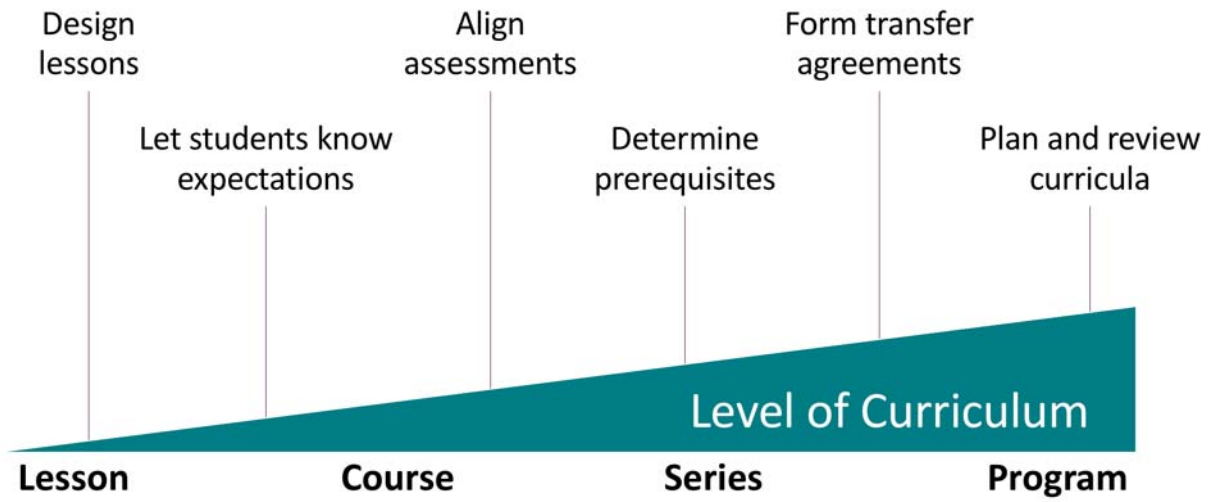

**Figure 5**

995  
996 **Figure 5. The BioSkills Guide can support a range of curricular scales.**

**Table 1. Core Competencies.**

<sup>a</sup> Adapted from Vision and Change (AAAS, 2011).

| <b>Core Competencies<sup>a</sup></b>   |
|----------------------------------------|
| 1. Process of Science                  |
| 2. Quantitative Reasoning              |
| 3. Modeling                            |
| 4. Interdisciplinary Nature of Science |
| 5. Communication & Collaboration       |
| 6. Science & Society                   |

**Table 2. Unique participants and institutions during BioSkills Guide development and validation.**

<sup>a</sup> Number of participants is an underestimation because not all participants completed sign-in sheet.

<sup>b</sup> Number of institutions is an underestimation because institution is unknown for some participants.

<sup>c</sup> Number of total participants is a conservative estimation due to missing information as described in <sup>a</sup> and <sup>b</sup>.

Number is lower than the sum of above rows because a small percent of people participated at multiple stages, which has been accounted for where possible (e.g., known participants were only counted once; anonymous survey respondents indicating they had previously reviewed the BioSkills Guide were deducted from the total).

| Phase                | Round                       | Mode of Review                                   | Number of Unique Participants | Number of Unique Institutions |
|----------------------|-----------------------------|--------------------------------------------------|-------------------------------|-------------------------------|
| Development          | Initial Drafting            | Faculty working groups + department round tables | 20                            | 1                             |
|                      |                             | Literature review                                |                               |                               |
|                      |                             | Interviews with competency experts               | 11                            | 4                             |
|                      |                             | Round table                                      | 24 <sup>a</sup>               | 6 <sup>b</sup>                |
|                      | Version I Review            | Written feedback from advisory board             | 3                             | 3                             |
|                      | Version II Review           | Workshop 1                                       | 24 <sup>a</sup>               | 4 <sup>b</sup>                |
|                      | Version III Review          | Survey 1                                         | 21                            | 18 <sup>b</sup>               |
|                      |                             | Workshop 2                                       | 6                             | 3                             |
|                      |                             | Survey 2                                         | 45                            | 19 <sup>b</sup>               |
|                      | Version IV Review           | Interviews with community college faculty        | 3                             | 3                             |
|                      |                             | Interviews with survey respondents               | 5                             | 5                             |
|                      |                             | Interviews with competency experts               | 6                             | 5                             |
|                      |                             | Round table                                      | 21                            | 17                            |
|                      |                             | Workshop 3                                       | 32                            | 22                            |
|                      | Version V Review            | Survey 3                                         | 27                            | 21 <sup>b</sup>               |
|                      |                             | Workshop 4                                       | 21                            | 1                             |
|                      |                             | Workshop 5                                       | 8                             | 1                             |
|                      | <b>Review, Combined</b>     | <b>218<sup>c</sup></b>                           | <b>87<sup>c</sup></b>         |                               |
| Validation           | Pilot                       | Survey 4                                         | 20                            | 11 <sup>b</sup>               |
|                      | National                    | Survey 5                                         | 397                           | 220 <sup>b</sup>              |
|                      | <b>Validation, Combined</b> |                                                  | <b>417</b>                    | <b>225<sup>c</sup></b>        |
| <b>All, Combined</b> |                             |                                                  | <b>634<sup>c</sup></b>        | <b>271<sup>c</sup></b>        |

**Table 3. Learning outcome ratings show increasing support over iterative rounds of revision.**

<sup>a</sup> Survey ratings were summarized by calculating the percent of respondents who selected 'Important' or 'Very Important' for each outcome (i.e. Percent Support). Outcomes were then binned into the indicated ranges. This data is visually represented in Figure 2.

<sup>b</sup> One outcome (out of 81 total) was mistakenly omitted from the Version III survey.

| Phase       | Round       | Learning Outcome Support Levels <sup>a</sup> |        |        |      | Total           |
|-------------|-------------|----------------------------------------------|--------|--------|------|-----------------|
|             |             | >90%                                         | 80-90% | 70-80% | <70% |                 |
| Development | Version III | 38                                           | 20     | 8      | 14   | 80 <sup>b</sup> |
|             | Version IV  | 57                                           | 14     | 4      | 3    | 78              |
|             | Version V   | 56                                           | 18     | 6      | 0    | 80              |
| Validation  | Pilot       | 66                                           | 8      | 3      | 0    | 77              |
|             | National    | 52                                           | 21     | 4      | 0    | 77              |
|             | Combined    | 51                                           | 22     | 4      | 0    | 77              |



**Table 4. Top five and bottom five supported learning outcomes from validation phase.**

<sup>a</sup> All outcomes except “Modeling: Build and evaluate models of biological systems” are course-level learning outcomes.

<sup>b</sup> Percent support was calculated as the percent of respondents who rated the outcome as ‘Important’ or ‘Very important’. Five highest and lowest rated outcomes by percent support are shown.

<sup>c</sup> Mean, maximum, and minimum of survey respondents’ importance ratings, where 5 = ‘Very Important’ and 1 = ‘Very Unimportant’.

| Competency                   | Outcome <sup>a</sup>                                                                                                                 | Percent Support <sup>b</sup> | Mean <sup>c</sup> | Max <sup>c</sup> | Min <sup>c</sup> |
|------------------------------|--------------------------------------------------------------------------------------------------------------------------------------|------------------------------|-------------------|------------------|------------------|
| Quantitative Reasoning       | Perform basic calculations (e.g., percentages, frequencies, rates, means).                                                           | 99.6                         | 4.9               | 5                | 3                |
| Quantitative Reasoning       | Create and interpret informative graphs and other data visualizations.                                                               | 99.6                         | 4.9               | 5                | 3                |
| Process of Science           | Analyze data, summarize resulting patterns, and draw appropriate conclusions.                                                        | 99.1                         | 4.8               | 5                | 1                |
| Quantitative Reasoning       | Interpret the biological meaning of quantitative results.                                                                            | 99.1                         | 4.7               | 5                | 3                |
| Quantitative Reasoning       | Record, organize, and annotate simple data sets.                                                                                     | 98.7                         | 4.8               | 5                | 3                |
| Process of Science           | Evaluate and suggest best practices for responsible research conduct (e.g., lab safety, record keeping, proper citation of sources). | 82                           | 4.2               | 5                | 2                |
| Science & Society            | Identify and describe how systemic factors (e.g., socioeconomic, political) affect how and by whom science is conducted.             | 78.9                         | 4.1               | 5                | 1                |
| Modeling                     | Modeling: Build and evaluate models of biological systems.                                                                           | 75.5                         | 4                 | 5                | 1                |
| Interdisc. Nature of Science | Suggest how collaborators in STEM and non-STEM disciplines could contribute to solutions of real-world problems.                     | 74.3                         | 4                 | 5                | 1                |
| Interdisc. Nature of Science | Describe examples of real-world problems that are too complex to be solved by applying biological approach alone.                    | 74                           | 4                 | 5                | 1                |
